# Supplementary material for: Dehydration of lactic acid to acrylic acid over lanthanum phosphate catalysts: the role of Lewis acid sites
Source: Royal Society of Chemistry journal article supplement (doi:10.1039/c6cp04163a), 2016-01-01
Supplement: c6cp04163a1.pdf [file c6cp04163a1.pdf]

## Supporting information

### Dehydration of lactic acid to acrylic acid over lanthanum phosphate catalysts: role of the Lewis acid sites

Zhen Guo, De Sheng Theng, Karen Yuanting Tang, Lili Zhang, Lin Huang, Armando Borgna, and Chuan Wang\*

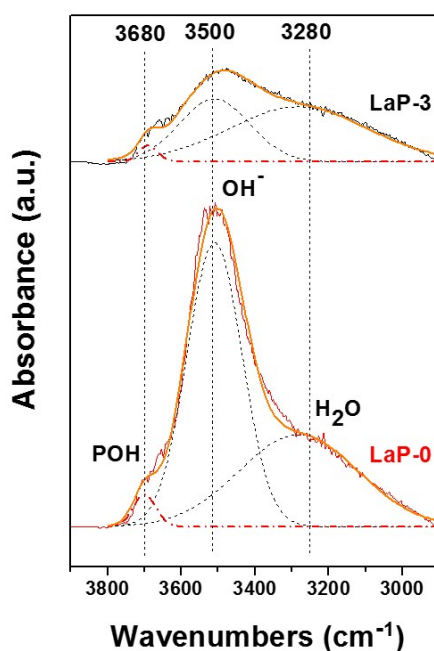

Fig. S1 DRIFTS spectra of LaP-0 and LaP-3.

Table S1 Catalytic results of the dehydration of lactic acid to acrylic acid over LaP-0 and LaP-3.

| Catalysts <sup>a</sup> | Conversion (%) | Selectivity (%) |              |                               |                |                     |                      | Carbon balance |
|------------------------|----------------|-----------------|--------------|-------------------------------|----------------|---------------------|----------------------|----------------|
|                        |                | Acrylic acid    | Acetaldehyde | 2,3-pentanedione <sup>e</sup> | Propanoic acid | Others <sup>b</sup> | Fouling <sup>c</sup> |                |
| LaP-0                  | 91.1           | 39.8            | 47.1         | 0.1                           | 0.4            | 10.6                | 2.1                  | 100.1          |
| LaP-3                  | 67.4           | 49.6            | 21.2         | 0.2                           | 3.1            | 20.8                | 2.8                  | 97.7           |

a. All results are based on 5 collection of time on stream (TOS), reaction temperature: 350°C, LA concentration: 20wt.%, catalyst loading: 0.2 g; b. Others include acetic acid, ethanol, hydroxyacetone and CO; c. Fouling is estimated from the weight loss after calcination of spent catalysts.
